# Supplementary material for: Leucine Supplementation Prevents the Development of Skeletal Muscle Dysfunction in a Rat Model of HFpEF
Source: MDPI journal article supplement (doi:10.3390/cells13060502), 2024-03-13

## WB evaluation of porin

Membrane was treated as followed

- Blocking 5% milk in TTBS
- anti-porin (1:1000, 2h, RT)
- Anti-rabbit POD (1:10'000, 1h, RT)
- Developed
- Anti-GAPDH (1:5000, 1h, RT)
- Anti-mouse POD (1:5000, 1h, RT)
- developed

Ob = HFpEF untreated

Pr = HFpEF primary prevention

Se = HFpEF secondary prevention

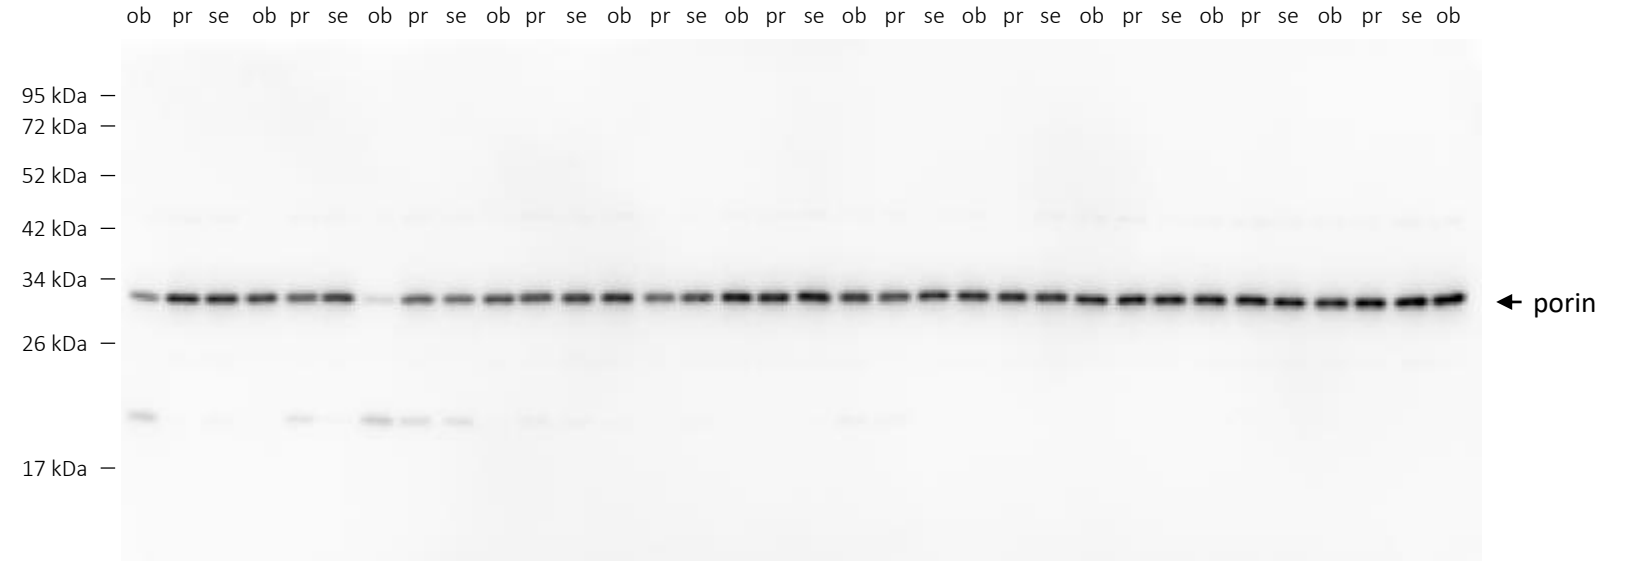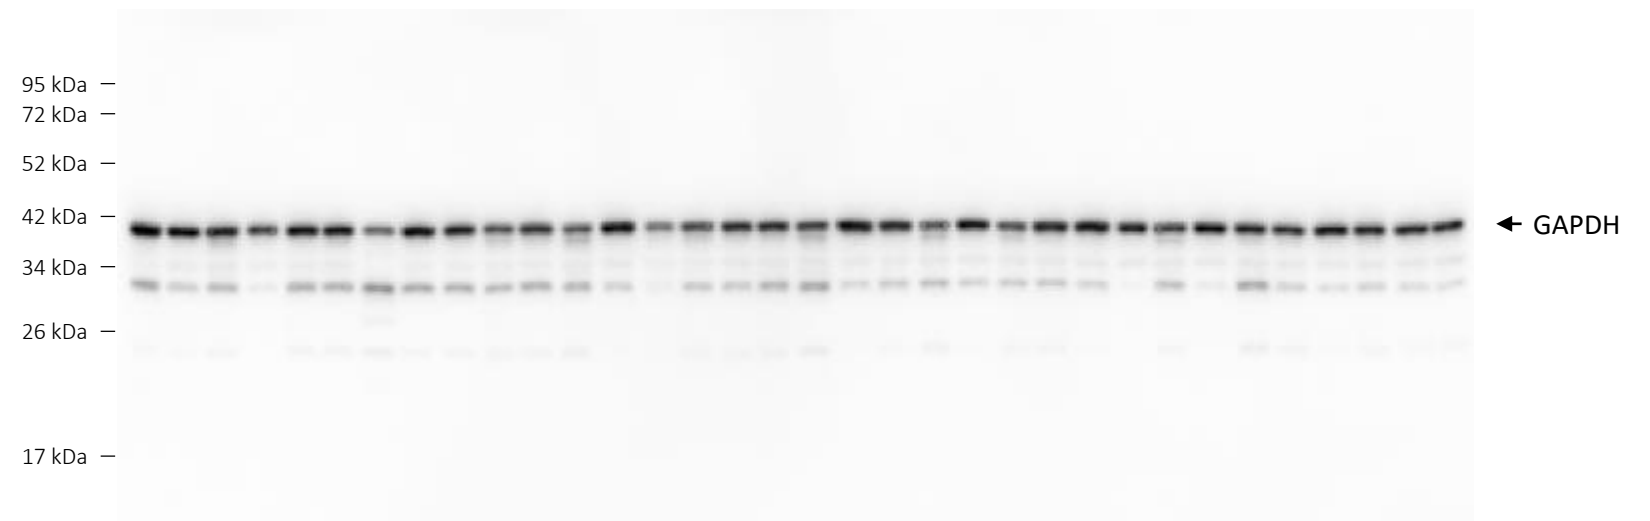

## WB evaluation of mitochondrial respiratory chain complex proteins

Membrane was treated as followed

- Blocking 5% milk in TTBS
- anti-total OXPHOS (1:250, O/N, 4°C)
- Anti-mouse POD (1:5000, 1h, RT)
- Developed
- Anti-GAPDH (1:5000, 1h, RT)
- Anti-mouse POD (1:5000, 1h, RT)
- developed

Ob = HFpEF untreated

Pr = HFpEF primary prevention

Se = HFpEF secondary prevention

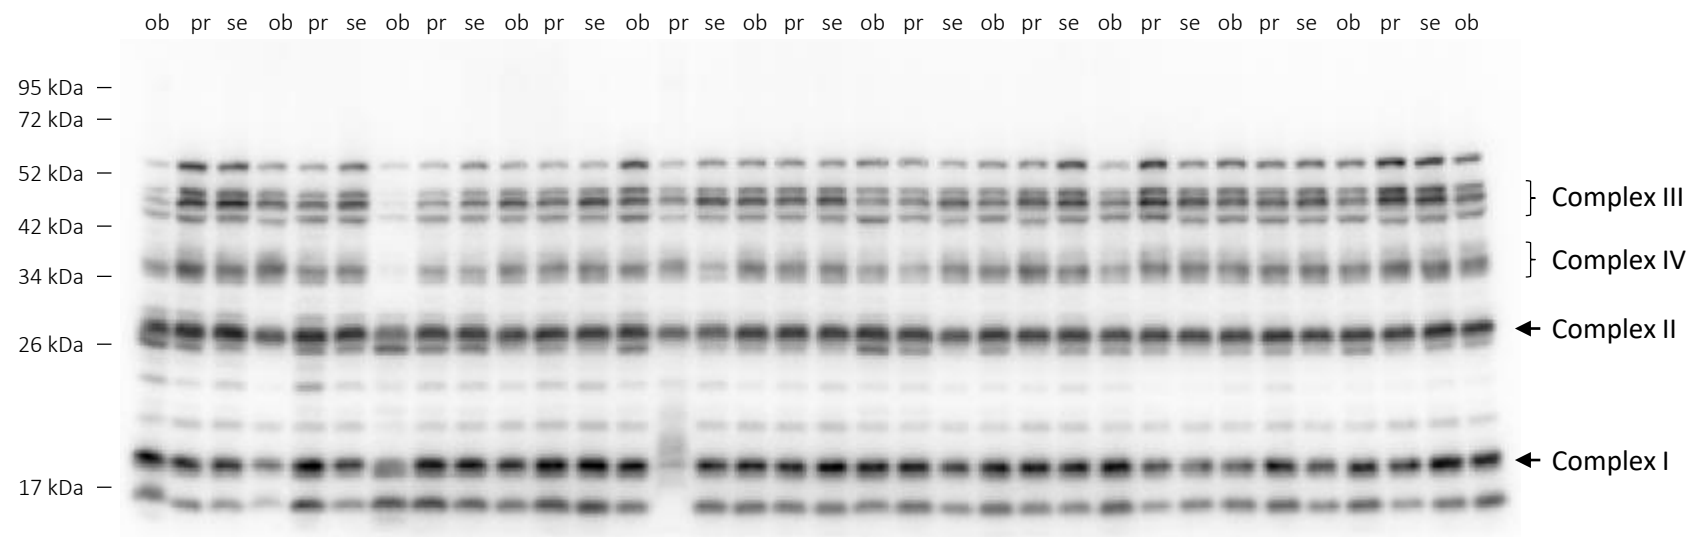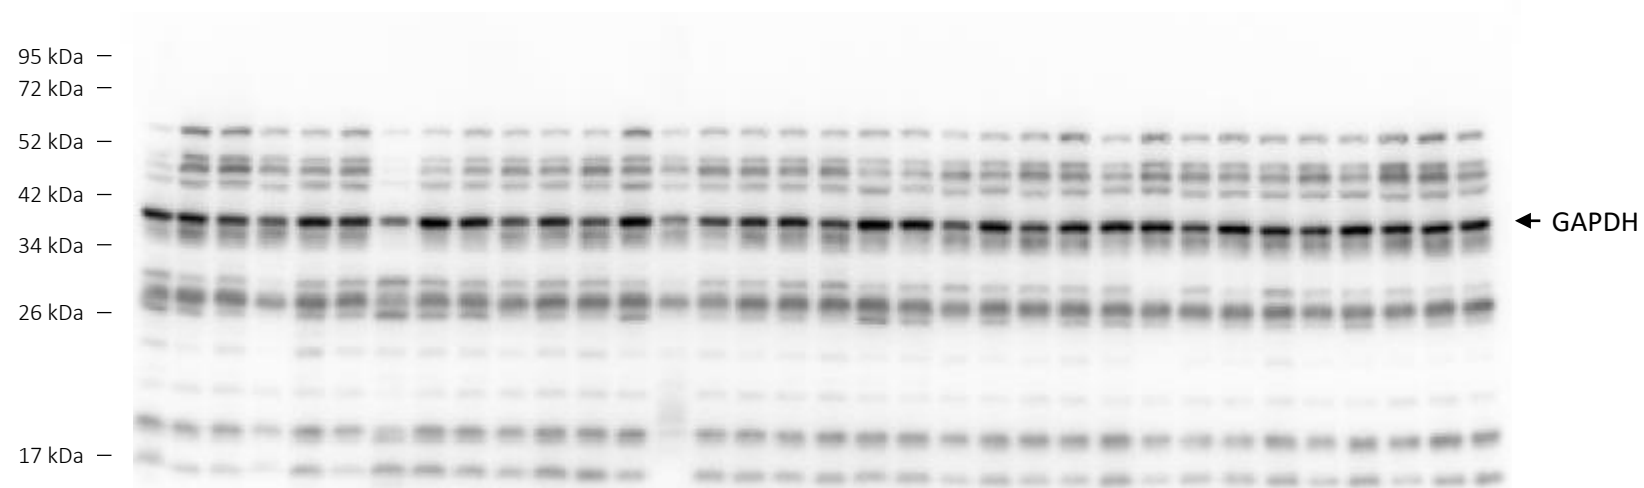

## WB evaluation of FIS1

Membrane was treated as followed

- Blocking 5% milk in TTBS
- anti-FIS1 (1:1000, O/N, 4°C)
- Anti-rabbit POD (1:10'000, 1h, RT)
- Developed
- Anti-GAPDH (1:5000, 1h, RT)
- Anti-mouse POD (1:5000, 1h, RT)
- developed

Ob = HFpEF untreated

Pr = HFpEF primary prevention

Se = HFpEF secondary prevention

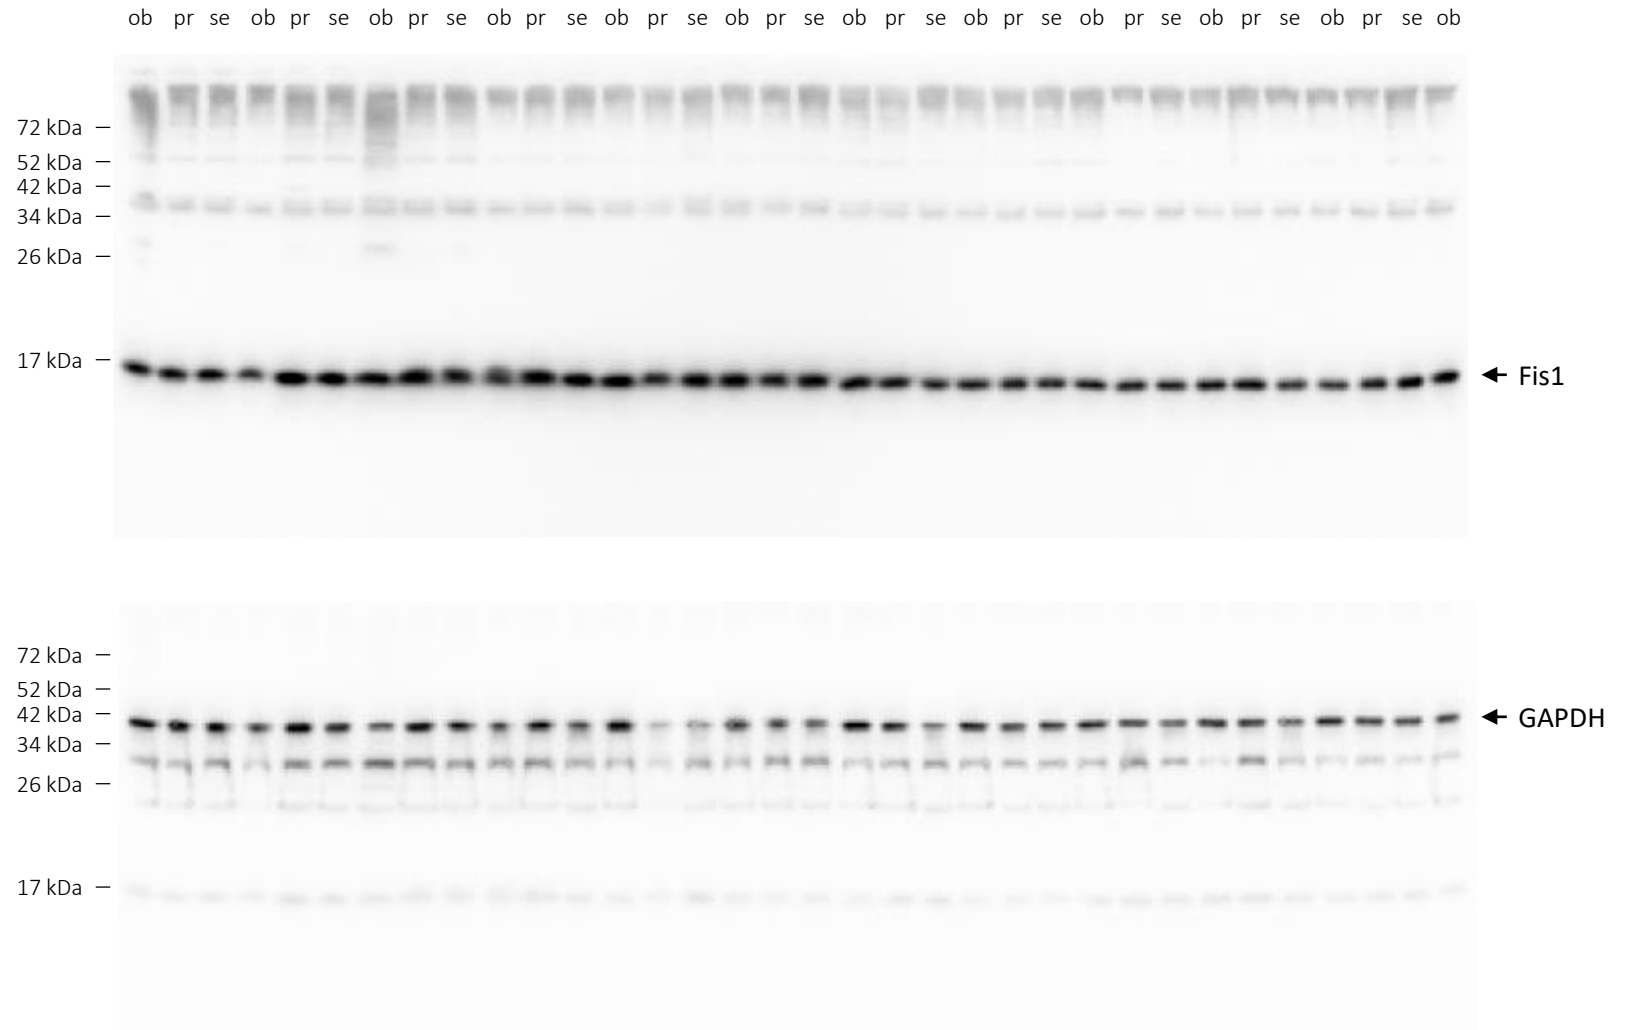

## WB evaluation of MFN2

Membrane was treated as followed

- Blocking 5% milk in TTBS
- anti-MFN2 (1:1000, O/N, 4°C)
- Anti-rabbit POD (1:10'000, 1h, RT)
- Developed
- Anti-GAPDH (1:5000, 1h, RT)
- Anti-mouse POD (1:5000, 1h, RT)
- developed

Ob = HFpEF untreated

Pr = HFpEF primary prevention

Se = HFpEF secondary prevention

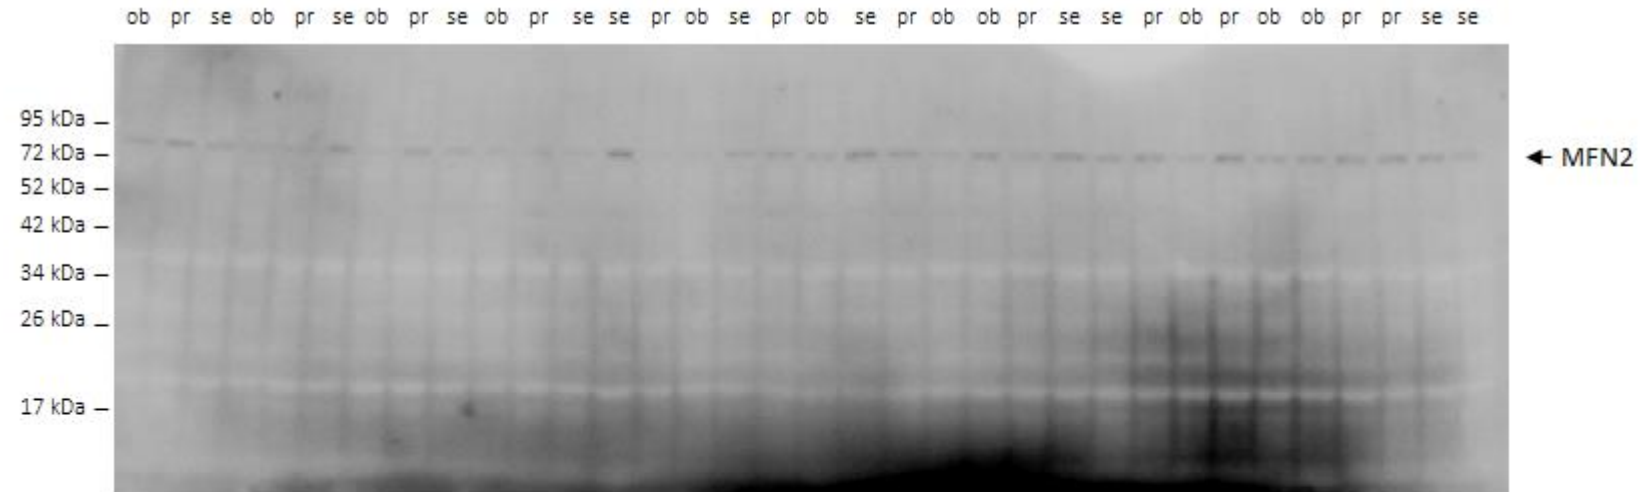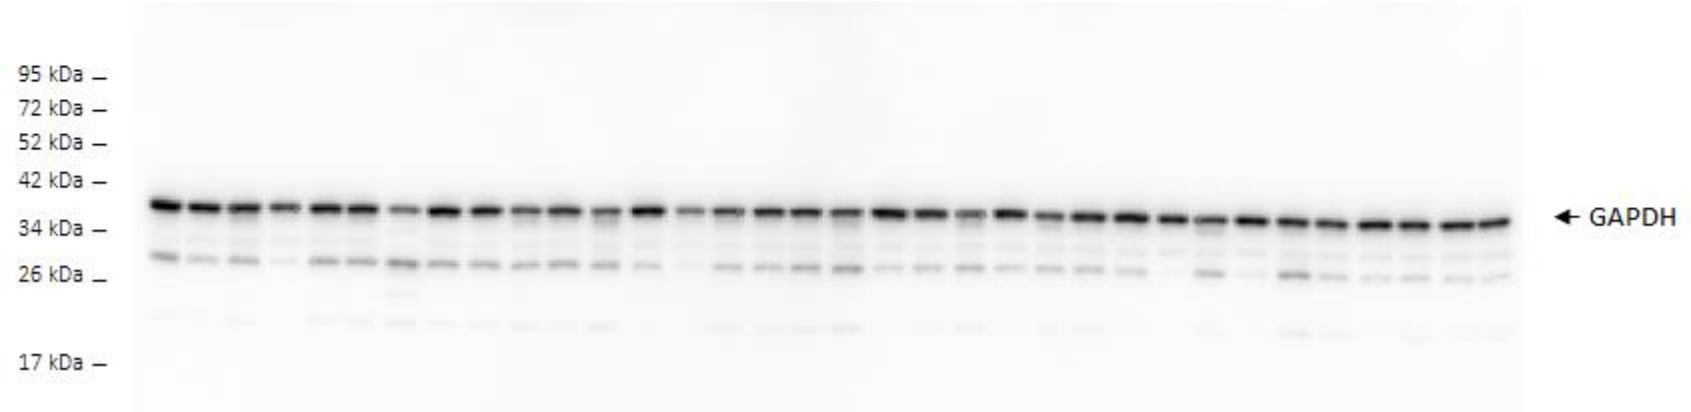

WB evaluation of mitofilin and mi-CK

Membrane was treated as followed

- Blocking 5% milk in TTBS
- anti-mitofilin (1:200, O/N, 4°C)
- Anti-mouse POD (1:5000, 1h, RT)
- Developed
- Anti-mi-CK (1:2000, 2h, RT)
- Anti-rabbit POD (1:10'000, 1h, RT)
- Developed
- Anti-GAPDH (1:5000, 1h, RT)
- Anti-mouse POD (1:5000, 1h, RT)
- Developed

Ob = HFpEF untreated  
Pr = HFpEF primary prevention  
Se = HFpEF secondary prevention

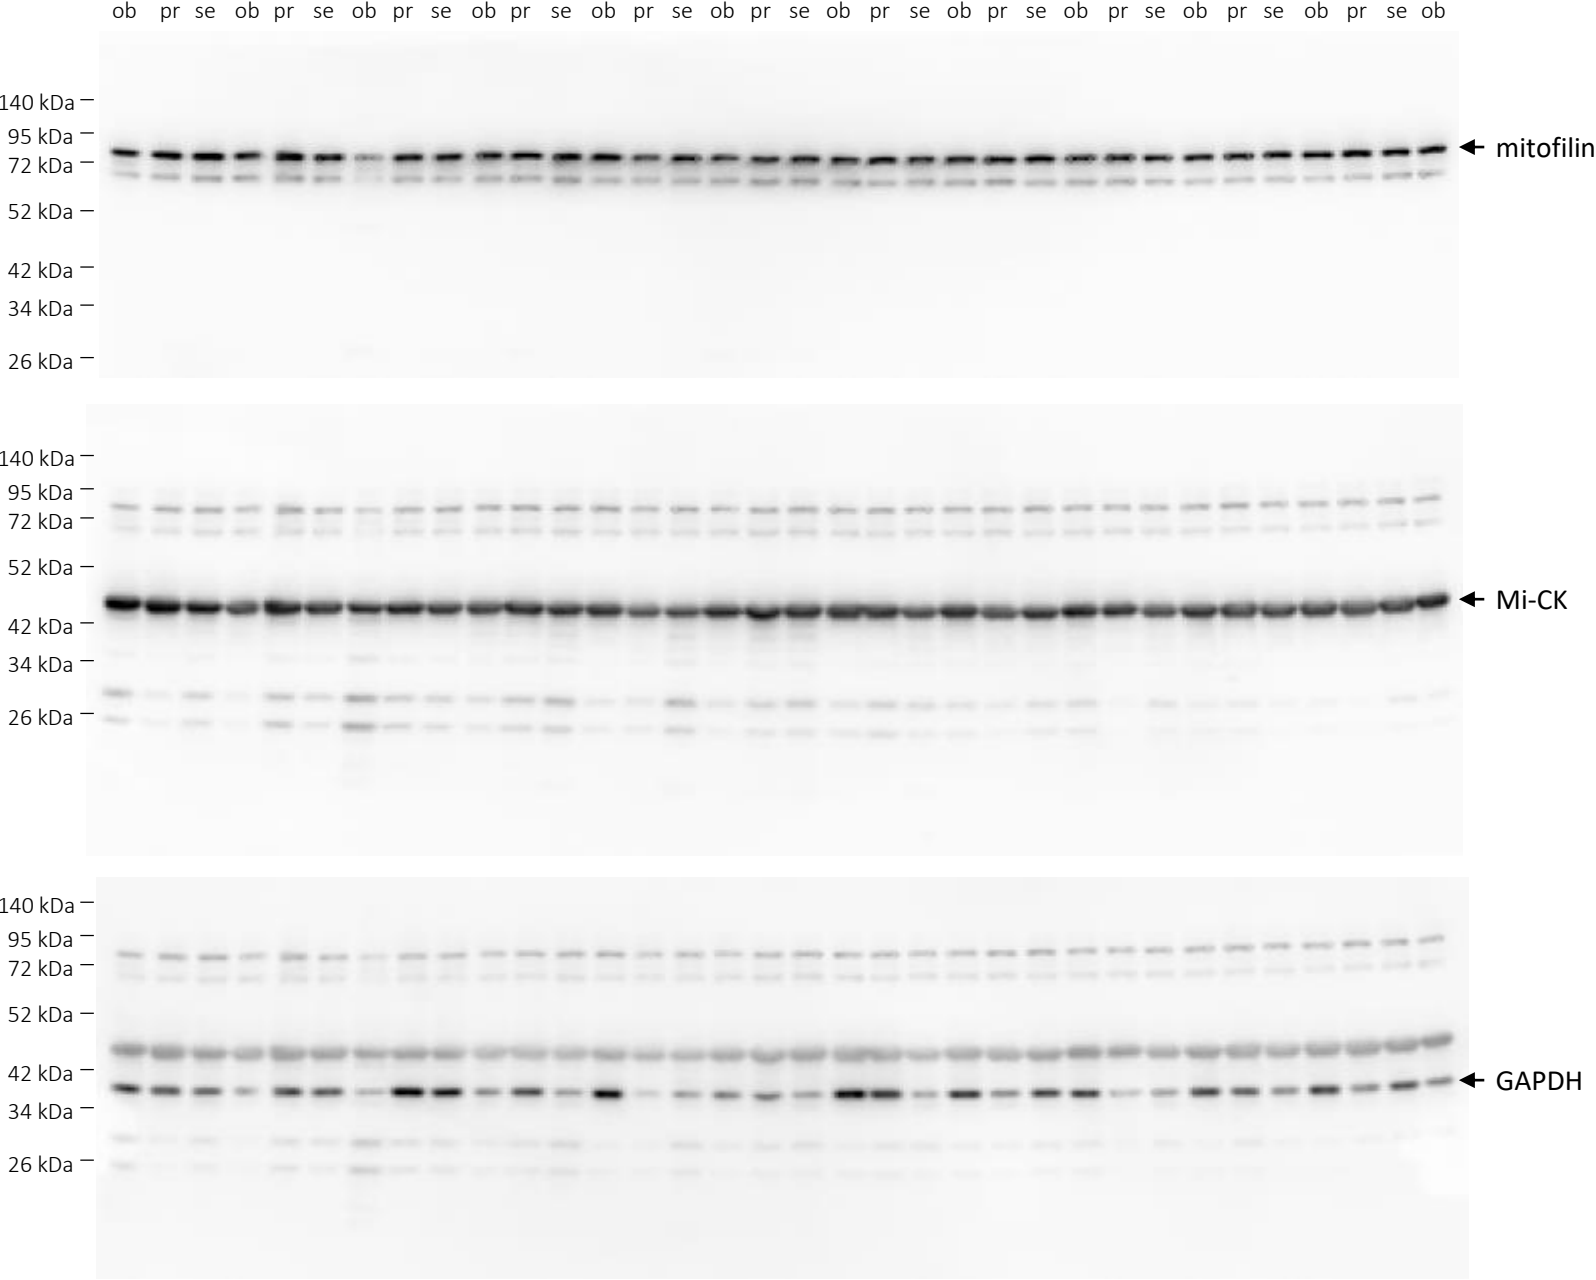

## WB evaluation of UCP3

Membrane was treated as followed

- Blocking 5% milk in TTBS
- anti-UCP3 (1:1000, O/N, 4°C)
- Anti-rabbit POD (1:10'000, 1h, RT)
- Developed
- Anti-GAPDH (1:5000, 1h, RT)
- Anti-mouse POD (1:5000, 1h, RT)
- developed

Ob = HFpEF untreated

Pr = HFpEF primary prevention

Se = HFpEF secondary prevention

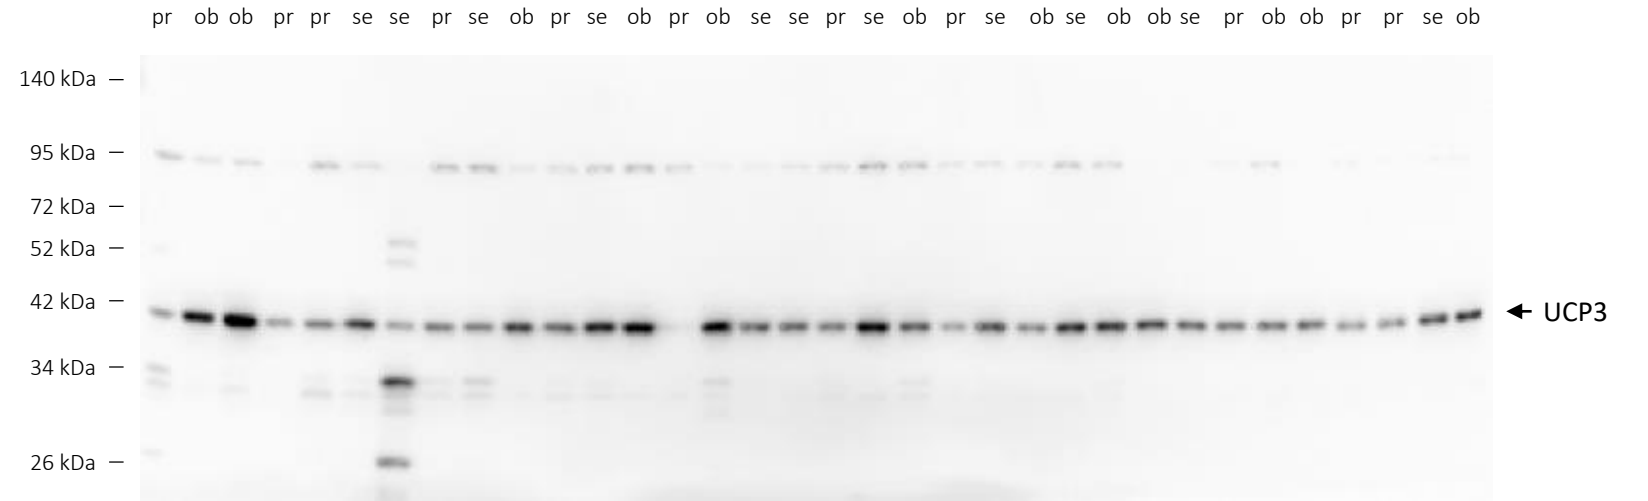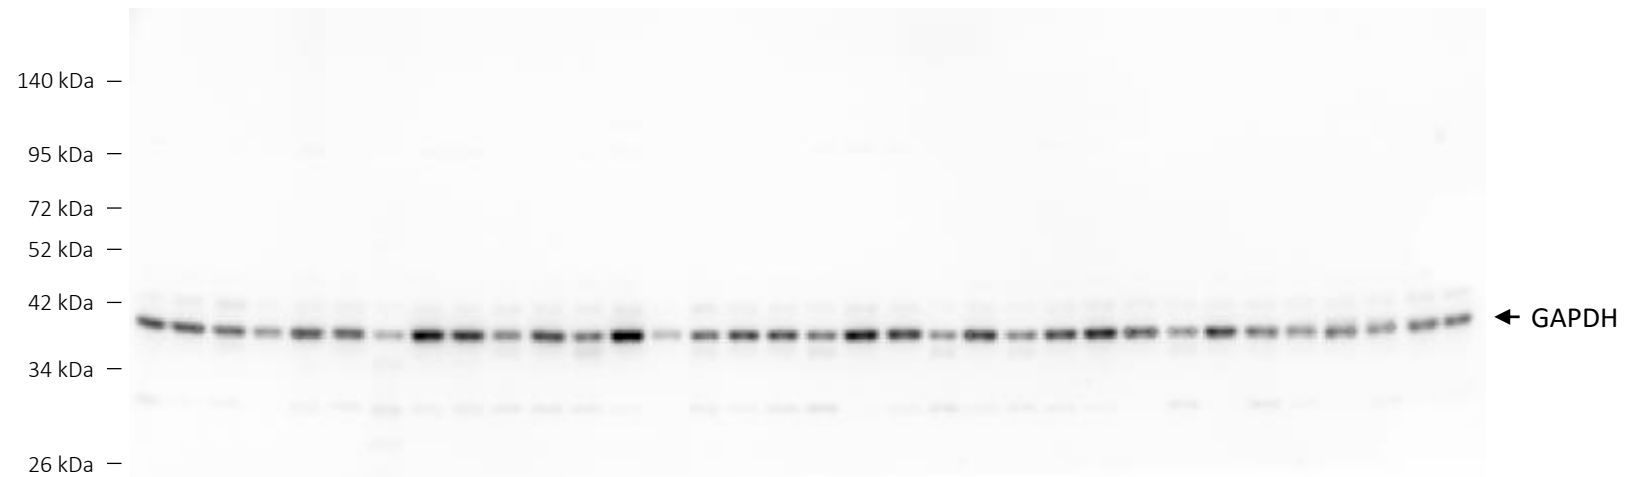

## WB evaluation of MCU

Membrane was treated as followed

- Blocking 5% milk in TTBS
- anti-MCU (1:1000, O/N, 4°C)
- Anti-rabbit POD (1:10'000, 1h, RT)
- Developed
- Anti-GAPDH (1:5000, 1h, RT)
- Anti-mouse POD (1:5000, 1h, RT)
- developed

Ob = HFpEF untreated

Pr = HFpEF primary prevention

Se = HFpEF secondary prevention

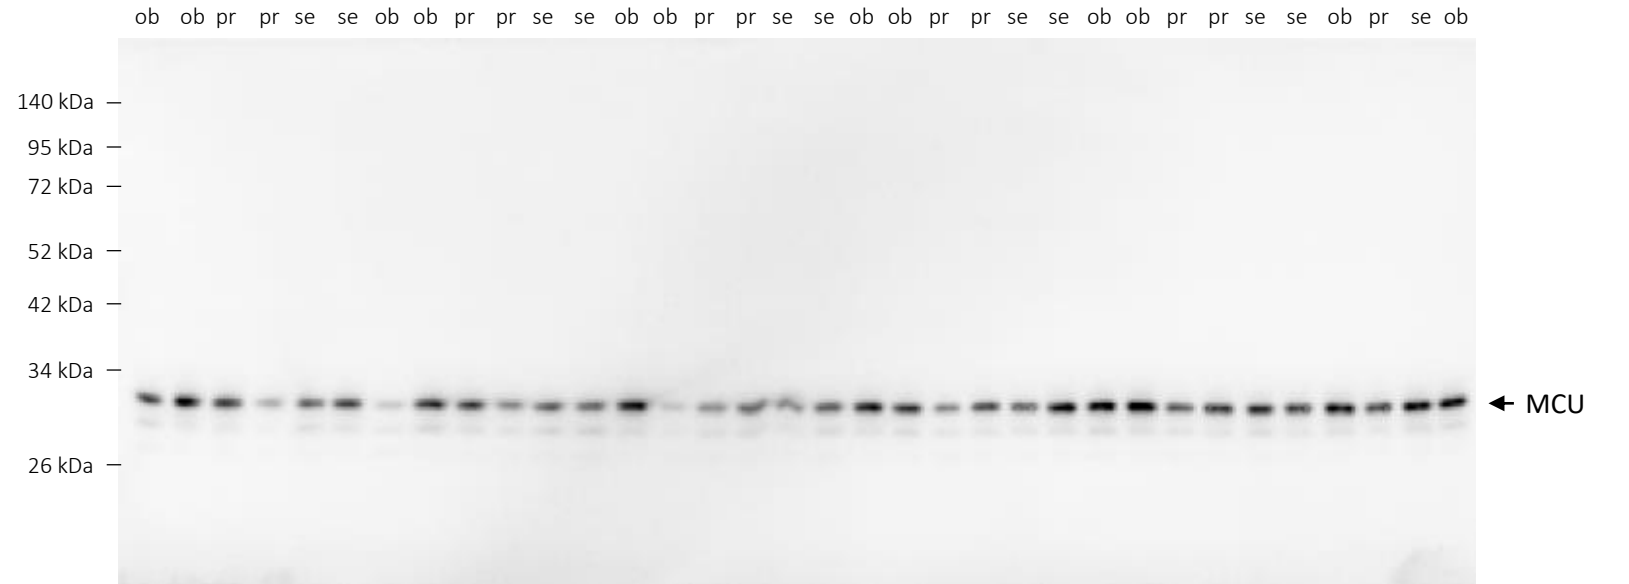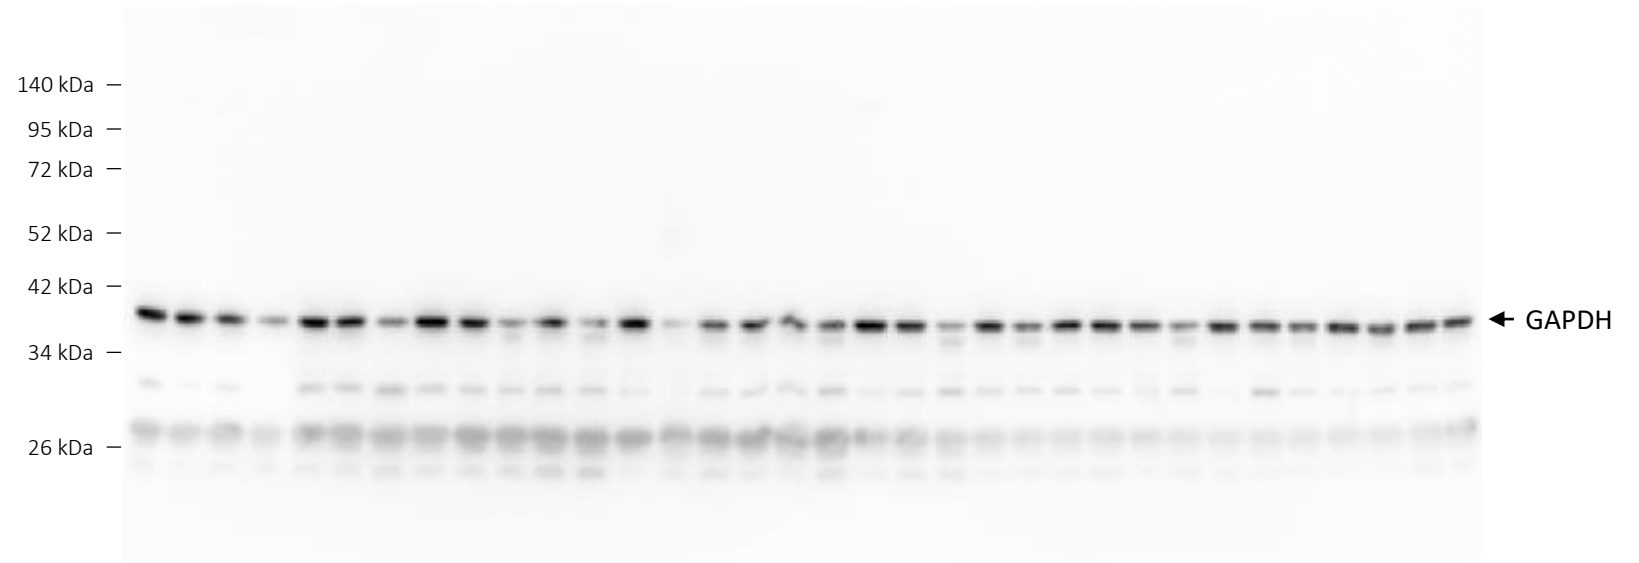

## WB evaluation of MuRF1

Membrane was treated as followed

- Blocking 5% milk in TTBS
- anti-MuRF1 (1:200, O/N, 4°C)
- Anti-mouse POD (1:5000, 1h, RT)
- Developed
- Anti-GAPDH (1:5000, 1h, RT)
- Anti-mouse POD (1:5000, 1h, RT)
- developed

Ob = HFpEF untreated

Pr = HFpEF primary prevention

Se = HFpEF secondary prevention

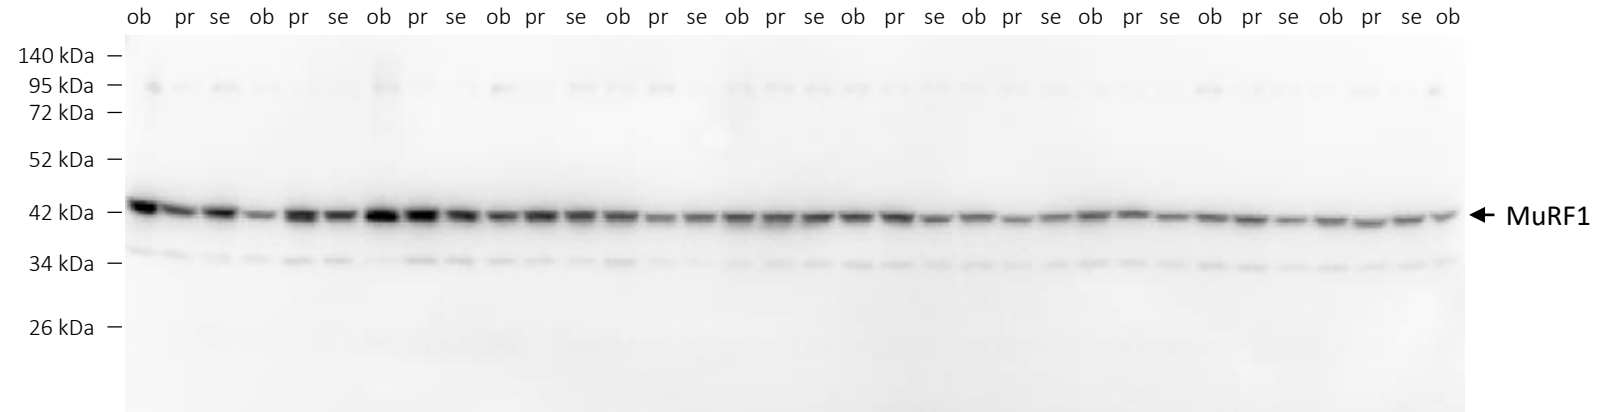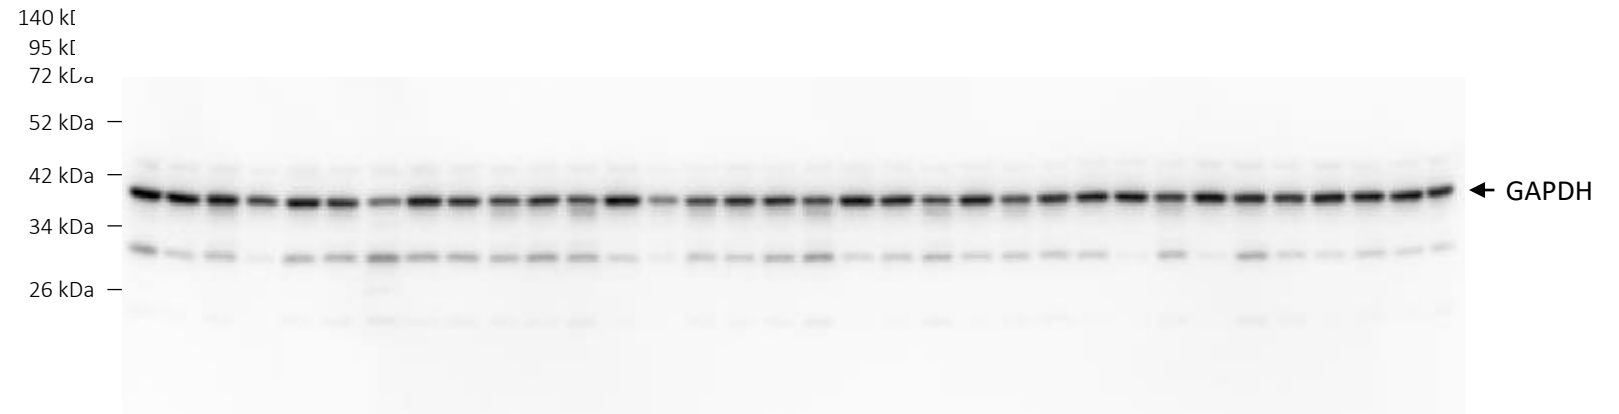



## WB evaluation of MAFBx

Membrane was treated as followed

- Blocking 5% milk in TTBS
- anti-MAFBx (1:1000, O/N, 4°C)
- Anti-rabbit POD (1:10'000, 1h, RT)
- Developed
- Anti-GAPDH (1:5000, 1h, RT)
- Anti-mouse POD (1:5000, 1h, RT)
- developed

Ob = HFpEF untreated

Pr = HFpEF primary prevention

Se = HFpEF secondary prevention

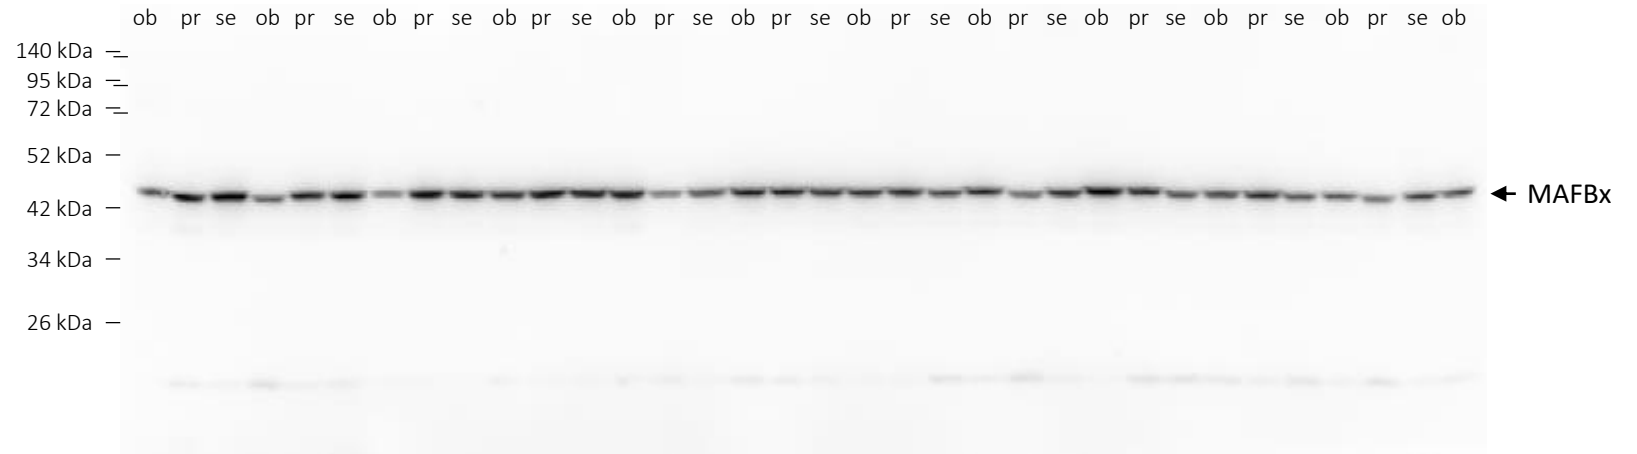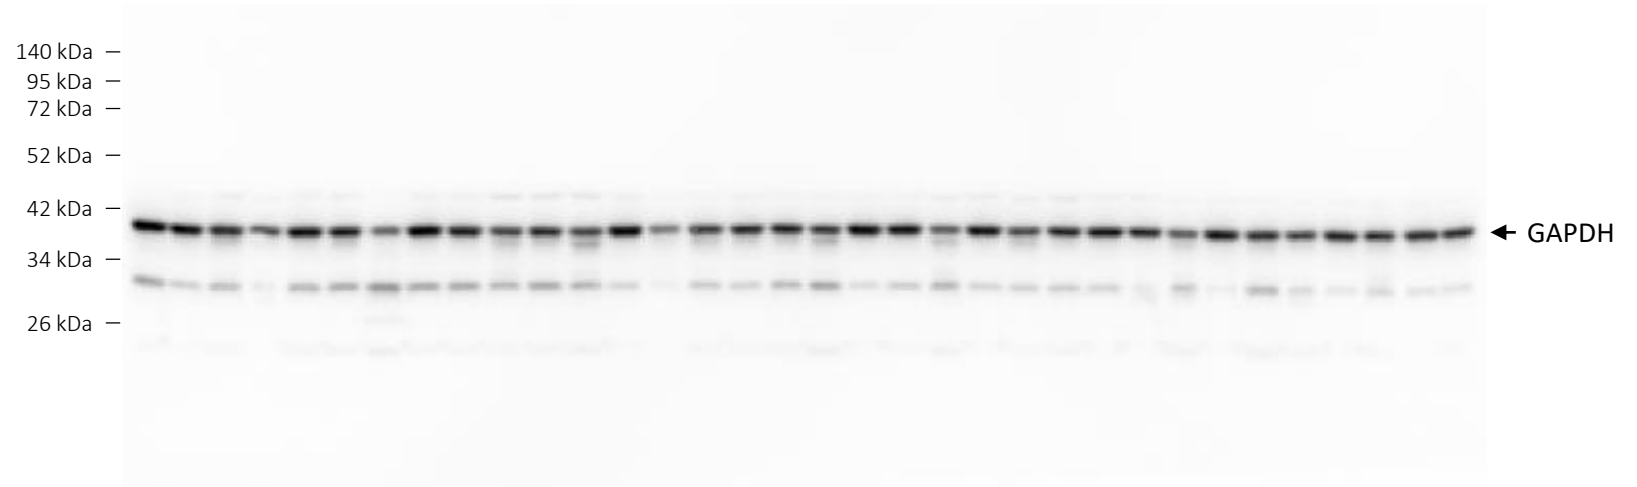

Supplement: s1 [file s1]
